# Supplementary material
Source: Springer Nature journal article supplement (https://www.springermedizin.de/resource/supplementary/12936_2013_3050_MOESM3_ESM.pdf/9544958)
Supplement: MOESM3 [file 9544958]

A map of Ghana with a light yellow background and black outlines for administrative regions. A large blue area in the center represents Lake Volta. Three pink rectangular boxes with black borders are placed on the map, each containing a black dot and a city name. The first box is at the top center, the second is on the right side, and the third is at the bottom center. The surrounding area is light gray, and the bottom edge shows a light blue sea.

•NAVRONGO

•HOHOE

•CAPE COAST
